# Supplementary material for: An Evolutionary Arms Race Between Burkholderia pseudomallei and Host Immune System: What Do We Know?
Source: Front Microbiol. 2021 Jan 21;11:612568. doi: 10.3389/fmicb.2020.612568 (PMC7858667; doi:10.3389/fmicb.2020.612568)
Supplement: Supplementary Text — We estimated the proportion of infection outcome variations (survival vs. mortal outcomes after 28 days) explained by B. pseudomallei nucleotide polymorphisms (SNPs). SNPs were called from Chewapreecha et al. (2019, 2020) using kSNP v3 software. A filtering for minimum allele frequency at 0.01 (MAF = 0.01) resulted in 65,379 SNPs for the analysis. B. pseudomallei population was defined by PopPUNK (Lees et al., 2019). We employed the Genome-wide Complex Trait Analysis (GCTA) (Yang et al., 2011) to calculate h2 using genomic restricted maximum likelihood (GREML) while adjusting for population structure using population clusters defined by PopPUNK. [file Table_1.XLSX]

## Sheet: Sheet1
Locus tag	Gene	Associated operons	Product (Ooi et al., 2015)	Localisation (Uniprot + burkholderia.com)	Associated genomic islands (Tuanyok et al., 2008)	Genetic variations observed	Geographical origin	References	Note
BPSL2786	-	CPS biosynthesis	putative acetyltransferase protein	cytoplasm (Cuccui et al., 2012)	NA	NA	NA	NA
BPSL2795	gmhA	CPS biosynthesis	putative sedoheptulose 7-phosphate isomerase	cytoplasm (Cuccui et al., 2012)	NA	NA	NA	NA
BPSL2810	manC	CPS biosynthesis	putative GDP-mannose pyrophosphorylase	cytoplasm (Cuccui et al., 2012)	NA	NA	NA	NA
BPSL2809	wcbA	CPS biosynthesis	putative capsule polysaccharide export protein	cytoplasm (Cuccui et al., 2012)	NA	Variable	Australia	Chewapreecha et al., 2017
BPSL2808	wcbB	CPS biosynthesis	putative capsular polysaccharide glycosyltransferase biosynthesis protein	cytoplasm (Cuccui et al., 2012)	NA	NA	NA
BPSL2807	wcbC	CPS biosynthesis	putative capsular polysaccharide biosynthesis/export protein	Outer membrane (Cuccui et al., 2012)	NA	NA	NA
BPSL2806a	wcbD	CPS biosynthesis	putative capsule polysaccharide export ABC transporter protein	periplasm (Cuccui et al., 2012)	NA	Variable	Australia	Chewapreecha et al., 2017
BPSL2803	wcbE	CPS biosynthesis	putative glycosyltransferase	cytoplasm (Cuccui et al., 2012)	NA	NA	NA	NA
BPSL2802	wcbF	CPS biosynthesis	putative capsule polysaccharide biosynthesis protein	cytoplasm (Cuccui et al., 2012)	NA	Variable	Australia	Chewapreecha et al., 2017
BPSL2801	wcbG	CPS biosynthesis	putative capsular polysaccharide biosynthesis protein	cytoplasm (Cuccui et al., 2012)	NA	NA	NA	NA
BPSL2800	wcbH	CPS biosynthesis	putative glycosyl transferase	cytoplasm (Cuccui et al., 2012)	NA	NA	NA	NA
BPSL2799	wcbI	CPS biosynthesis	putative capsular polysaccharide biosynthesis protein	cytoplasm (Cuccui et al., 2012)	NA	NA	NA	NA
BPSL2798	wcbJ	CPS biosynthesis	putative capsular polysaccharide biosynthesis protein	unknown (Cuccui et al., 2012)	NA	NA	NA	NA
BPSL2797	wcbK	CPS biosynthesis	putative GDP sugar epimerase/dehydratase protein	cytoplasm (Cuccui et al., 2012)	NA	NA	NA	NA
BPSL2796	wcbL	CPS biosynthesis	putative sugar kinase	cytoplasm (Cuccui et al., 2012)	NA	Absence	Australia	Challacombe et al., 2014
BPSL2794	wcbM	CPS biosynthesis	putative D-glycero-d-manno-heptose 1-phosphate guanosyltransferase	cytoplasm (Cuccui et al., 2012)	NA	NA	NA	NA
BPSL2793	wcbN	CPS biosynthesis	putative D-glycero-d-manno-heptose 1,7-bisphosphate phosphatase	cytoplasm (Cuccui et al., 2012)	NA	NA	NA	NA
BPSL2792	wcbO	CPS biosynthesis	putative capsule polysaccharide biosynthesis/export protein	cytoplasm (Cuccui et al., 2012)	NA	NA	NA	NA
BPSL2791	wcbP	CPS biosynthesis	putative capsular polysaccharide biosynthesis dehydrogenase/reductase protein	cytoplasm (Cuccui et al., 2012)	NA	NA	NA	NA
BPSL2790	wcbQ	CPS biosynthesis	putative capsular polysaccharide biosynthesis transmembrane protein	cytoplasm (Cuccui et al., 2012)	NA	NA	NA	NA
BPSL2789	wcbR	CPS biosynthesis	capsular polysaccharide biosynthesis fatty acid synthase	cytoplasm (Cuccui et al., 2012)	NA	Single nucleotide insertion	Australia	Price et al., 2013; Pearson et al., 2020	With-in host variation. Associated with Chronic infection
BPSL2788	wcbS	CPS biosynthesis	UDP-3-O-[3-hydroxymyristoyl] N-acetylglucosamine deacetylase	cytoplasm (Cuccui et al., 2012)	NA	NA	NA	NA
BPSL2787	wcbT	CPS biosynthesis	putative acyl-CoA transferase	cytoplasm (Cuccui et al., 2012)	NA	NA	NA	NA
BPSL2805	wzm	CPS biosynthesis	capsular polysaccharide export ABC transporter part of transmembrane protein (Vander Broek and Stevens,2017) protein	cytoplasmic membrane (Cuccui et al., 2012)	NA	NA	NA	NA
BPSL2804	wzt2	CPS biosynthesis	ATP-binding ABC transporter capsular polysaccharide export protein	cytoplasm (Cuccui et al., 2012)	NA	NA	NA	NA
BPSL3319	fliC	flagellar	flagellin	Extracellular/bacterial flagellum	NA	SNP	Malaysia	Tay et al., 2010
BPSL0030	fliO	flagellar	flagellar protein	cytoplasmic membrane	NA	NA	NA	NA
BPSL0031	fliP	flagellar	flagellar biosynthetic protein	cytoplasmic membrane	NA	NA	NA	NA
BPSL0032	fliQ	flagellar	flagellar biosynthesis protein	cytoplasmic membrane	NA	NA	NA	NA
BPSS2053	fhaB3	hemagglutinin	cell surface protein	Outer membrane	Cluster I (GI5/GI5a.1/GI5.2), Cluster II (GI11.1), cluster III (GI16/GI16.1)	Absence and partial deletion	Thailand, Australia and Africa	Sarovich et al., 2014; Sarovich et al., 2016	Associated with Skin abscess formation and lower mortality rate
BPSL2667	-	LPS biosynthesis	putative lipopolysaccharide biosynthesis protein	cytoplasmic membrane	NA	Absence	SE Asia	Sim et al., 2008
BPSL2668	-	LPS biosynthesis	putative glycosyl transferase	unknown	NA	Absence	SE Asia	Sim et al., 2008
BPSS2245	-	LPS biosynthesis	epimerase	cytoplasm	NA	Absence	SE Asia	Sim et al., 2008
BPSS2246	-	LPS biosynthesis	sensor kinase/response regulator fusion protein	cytoplasmic membrane	NA	Absence	SE Asia	Sim et al., 2008
BPSS2247	-	LPS biosynthesis	hypothetical protein	unknown	NA	Absence	SE Asia	Sim et al., 2008
BPSS2248	-	LPS biosynthesis	transferase	cytoplasmic membrane	NA	Absence	SE Asia	Sim et al., 2008
BPSS2249	-	LPS biosynthesis	sigma-54 interacting response regulator	cytoplasm	NA	Absence	SE Asia	Sim et al., 2008
BPSS2250	-	LPS biosynthesis	sigma-54 interacting transcriptional regulator	cytoplasm	NA	Absence	SE Asia	Sim et al., 2008
BPSS2251	-	LPS biosynthesis	LPS biosynthesis related transferase	cytoplasm	NA	Absence	SE Asia	Sim et al., 2008
BPSS2252	-	LPS biosynthesis	LPS biosynthesis related glycosyltransferase	cytoplasm	NA	Absence	SE Asia	Sim et al., 2008
BPSS2253	-	LPS biosynthesis	glycosyltransferase	unknown	NA	Absence	SE Asia	Sim et al., 2008
BPSS2254	-	LPS biosynthesis	carbamoyltransferase	cytoplasm	NA	Absence	SE Asia	Sim et al., 2008
BPSS2255	-	LPS biosynthesis	glycosyltransferase family 9 protein	unknown	NA	Absence	SE Asia	Sim et al., 2008
D512_06755 (BPSL1120 in K96243)	-	LPS biosynthesis	LPS heptosyltransferase I	Cytoplasm	NA	Single nucleotide insertion and partial deletion	Australia	Tuanyok et al., 2012; Price et al., 2013; Pearson et al., 2020)	Rare, With-in host variation, and associated with relapse infection
BPSL2666	pgm	LPS biosynthesis	phosphoglucomutase	cytoplasm	NA	Absence	SE Asia	Sim et al., 2008
BPSS0429	-	O-antigen LPS biosynthesis	hypothetical protein	transmembrane protein	NA	Absence	SE Asia	Sim et al., 2008
BPSS0427	wbbJ	O-antigen LPS biosynthesis	O-acetyle transferase	Cytoplasm	NA	Absence	SE Asia	Sim et al., 2008
BPSS0428	wbcC	O-antigen LPS biosynthesis	glycosyltransferase	transmembrane protein	NA	Absence	SE Asia	Sim et al., 2008
BPSL2680	wbiA	O-antigen LPS biosynthesis	putative O-antigen acetylase	cytoplasmic membrane	NA	Single nucleotide insertion and partial deletion	Australia	Tuanyok et al., 2012; Price et al., 2013; Pearson et al., 2020	Rare, With-in host variation, and associated with relapse infection
BPSL2679	wbiB	O-antigen LPS biosynthesis	putative epimerase/dehydratase	cytoplasm	NA	NA	NA
BPSL2678	wbiC	O-antigen LPS biosynthesis	putative glycosyl transferase	unknown	NA	NA	NA
BPSL2677	wbiD	O-antigen LPS biosynthesis	putative O-antigen methyl transferase	cytoplasm	NA	NA	NA
BPSL2676	wbiE	O-antigen LPS biosynthesis	putative glycosyl transferase	cytoplasmic membrane	NA	NA	NA
BPSL2675	wbiF	O-antigen LPS biosynthesis	putative glycosyl transferase	unknown	NA	NA	NA
BPSL2674	wbiG	O-antigen LPS biosynthesis	putative epimerase/dehydratase	cytoplasm	NA	NA	NA
BPSL2673	wbiH	O-antigen LPS biosynthesis	putative undecaprenyl phosphate N-acetylglucosaminyltransferase	cytoplasmic membrane	NA	Single nucleotide insertion and partial deletion	Australia	Tuanyok et al., 2012; Price et al., 2013; Pearson et al., 2020	Rare, With-in host variation, and associated with relapse infection
BPSL2672	wbiI	O-antigen LPS biosynthesis	putative epimerase/dehydratase polysaccharide-related biosynthesis protein	cytoplasmic membrane	NA	Single nucleotide insertion and partial deletion	Australia	Tuanyok et al., 2012; Price et al., 2013; Pearson et al., 2020	Rare, With-in host variation, and associated with relapse infection
BPSL1626	-	pilus	putative fimbrial subunit type 1 precursor	Extracellular	NA	Amino acid variation	NA	Capelli et al., 2018
BPSL0782	pilA	pilus	putative type 4 fimbrial pilin protein	Extracellular	NA	NA	NA	NA
BPSS1525	bopE	T3SS	T3SS effector	Extracellular	NA	NA	NA	NA
BPSS1550	bsaJ	T3SS	Type III secretion system protein	Outer membrane	NA	NA	NA	NA
BPSS1549	bsaK	T3SS	Type III secretion system protein	part of transmembrane protein (Vander Broek and Stevens,2017)	NA	NA	NA	NA
BPSS1548	bsaL	T3SS	Type III secretion system protein	part of transmembrane protein (Vander Broek and Stevens,2017)	NA	NA	NA	NA
BPSS1547	bsaM	T3SS	type III secretion system protein	part of transmembrane protein (Vander Broek and Stevens,2017)	NA	NA	NA	NA
BPSS1546	bsaN	T3SS	AraC-family regulator of type III secretion system	cytoplasms	NA	Variable	Global population	Chewapreecha et al., 2017
BPSS1545	bsaO	T3SS	Type III secretion system protein	part of transmembrane protein (Vander Broek and Stevens,2017)	NA	NA	NA	NA
BPSS1544	bsaP	T3SS	Type III secretion system protein	cytoplasmic membrane	NA	Variable	Global population	Chewapreecha et al., 2017
BPSS1543	bsaQ	T3SS	Type III secretion system protein	part of transmembrane protein (Vander Broek and Stevens,2017)	NA	NA	NA	NA
BPSS1542	bsaR	T3SS	surface presentation of antigens protein	cytoplasmic membrane	NA	Variable	Global population	Chewapreecha et al., 2017
BPSS1541	bsaS	T3SS	type III secretion system ATPase	part of transmembrane protein (Vander Broek and Stevens,2017)	NA	NA	NA	NA
BPSS1540	bsaT	T3SS	surface presentation of antigens protein	part of transmembrane protein (Vander Broek and Stevens,2017)	NA	NA	NA	NA
BPSS1539	bsaU	T3SS	hypothetical protein	unknown	NA	Variable	Global population	Chewapreecha et al., 2017
BPSS1538	bsaV	T3SS	surface presentation of antigens protein	cytoplasms	NA	NA	NA	NA
BPSS1537	bsaW	T3SS	surface presentation of antigens protein	part of transmembrane protein (Vander Broek and Stevens,2017)	NA	NA	NA	NA
BPSS1536	bsaX	T3SS	surface presentation of antigens protein	part of transmembrane protein (Vander Broek and Stevens,2017)	NA	NA	NA	NA
BPSS1535	bsaY	T3SS	surface presentation of antigens protein	part of transmembrane protein (Vander Broek and Stevens,2017)	NA	NA	NA	NA
BPSS1534	bsaZ	T3SS	type III secretion protein	part of transmembrane protein (Vander Broek and Stevens,2017)	NA	NA	NA	NA
BPSS1504	tagAB-5	T6SS	hypothetical protein	Extracellular	NA	NA	NA	NA
BPSS1505	tagB-5	T6SS	hypothetical protein	Extracellular	NA	NA	NA	NA
BPSS1506	tagC-5	T6SS	hypothetical protein	cytoplasms	NA	NA	NA	NA
BPSS1507	tagD-5	T6SS	hypothetical protein	unknown	NA	NA	NA	NA
BPSS1493	tssA-5	T6SS	hypothetical protein	cytoplasms	NA	NA	NA	NA
BPSS1496	tssB-5	T6SS	hypothetical protein	cytoplasms	NA	NA	NA	NA
BPSS1497	tssC-5	T6SS	hypothetical protein	Extracellular	NA	NA	NA	NA
BPSS1498	tssD-5 (hcp1)	T6SS	hypothetical protein	cytoplasms	NA	variable	Thailand	Unpubliced observation
BPSS1499	tssE-5	T6SS	hypothetical protein	cytoplasms	NA	NA	NA	NA
BPSS1500	tssF-5	T6SS	hypothetical protein	cytoplasms	NA	NA	NA	NA
BPSS1501	tssG-5	T6SS	hypothetical protein	cytoplasms	NA	NA	NA	NA
BPSS1502	tssH-5	T6SS	Clp-type ATPase chaperone protein	cytoplasms	NA	NA	NA	NA
BPSS1503	tssI-5	T6SS	hypothetical protein	cytoplasms	NA	NA	NA	NA
BPSS1508	tssJ-5	T6SS	hypothetical protein	unknown	NA	NA	NA	NA
BPSS1509	tssK-5	T6SS	hypothetical protein	cytoplasms	NA	NA	NA	NA
BPSS1510	tssL-5	T6SS	hypothetical protein	unknown	NA	NA	NA	NA
BPSS1511	tssM-5	T6SS	hypothetical protein	cytoplasmic membrane	NA	NA	NA	NA
BPSS1492	bimA	Trimeric Autotransported adhesins	hypothetical protein	Outer membrane	NA	Two variants, bimABP and bimABM	SE Asia and Africa (bimABP) Australia and India (bimABM)	Shaw et al., 2019; Sarovich et al., 2014; Sarovich et al., 2016; Sitthidet et al., 2008; Mukhopadhyay et al., 2011	Neurological presentation (bimABM)
BPSS0796	boaA	Trimeric Autotransported adhesins	surface-exposed protein	Outer membrane	NA	NA	NA	NA
BPSL1705	boaB	Trimeric Autotransported adhesins	hypothetical protein	Outer membrane	GI8	Absence	Africa, Brazil, Thailand and Australia	Sarovich et al., 2016
BPSS1434	bpaA	Two-partner secreting system	membrane-anchored cell surface protein	unknown	GI15d (MSHR305)	Absence	Australia	Tuanyok et al., 2008; Brown et al., 2004	Rare
BPSL2063	bpaB	Two-partner secreting system	hypothetical protein	Outer membrane	GI15d (MSHR305)	Absence	Australia and Madagascar	Sarovich et al., 2016
BPSL1631	bpaC	Two-partner secreting system	putative outer membrane protein	Outer membrane	NA	NA	NA	NA
BPSS0088	bpaD	Two-partner secreting system	hypothetical protein	Outer membrane	NA	Absence and variable	Africa	Sarovich et al., 2016
BPSS0908	bpaE	Two-partner secreting system	surface-exposed protein	Outer membrane	NA	NA	NA	NA
Reference
1	Brown, N.F., et al., Identification of a novel two-partner secretion system from Burkholderia pseudomallei. Molecular Genetics and Genomics, 2004. 272(2): p. 204-215.
2	Challacombe, J.F., et al., Interrogation of the Burkholderia pseudomallei genome to address differential virulence among isolates. PloS One, 2014. 9(12): p. e115951.
3	Chewapreecha, C., et al., Global and regional dissemination and evolution of Burkholderia pseudomallei. Nature Microbiology, 2017. 2(4): p. 1-8.
4	Cuccui, J., et al., Characterization of the Burkholderia pseudomallei K96243 capsular polysaccharide I coding region. Infection and Immunity, 2012. 80(3): p. 1209-1221.
5	Capelli, R., et al., BPSL1626: Reverse and Structural Vaccinology Reveal a Novel Candidate for Vaccine Design against Burkholderia pseudomallei. Antibodies (Basel, Switzerland), 2018. 7(3).
6	Mukhopadhyay, C., et al., Molecular Characterization of Clinical Burkholderia pseudomallei Isolates from India. The American Journal of Tropical Medicine and Hygiene, 2011. 85(1): p. 121-123.
7	Pearson, T., et al., Pathogen to commensal? Longitudinal within-host population dynamics, evolution, and adaptation during a chronic >16-year Burkholderia pseudomallei infection. PLOS Pathogens, 2020. 16(3): p. e1008298.
8	Price, E.P., et al., Within-host evolution of Burkholderia pseudomallei over a twelve-year chronic carriage infection. mBio, 2013. 4(4).
9	Sarovich, D.S., et al., Phylogenomic Analysis Reveals an Asian Origin for African Burkholderia pseudomallei and Further Supports Melioidosis Endemicity in Africa. mSphere, 2016. 1(2).
10	Sarovich, D.S., et al., Variable Virulence Factors in Burkholderia pseudomallei (Melioidosis) Associated with Human Disease. PLOS ONE, 2014. 9(3): p. e91682.
11	Sim, S.H., et al., The Core and Accessory Genomes of Burkholderia pseudomallei: Implications for Human Melioidosis. PLoS Pathogens, 2008. 4(10).
12	Shaw, T., et al., Implications of environmental and pathogen-specific determinants on clinical presentations and disease outcome in melioidosis patients. PLoS neglected tropical diseases, 2019. 13(5): p. e0007312.
13	Sitthidet, C., et al., Prevalence and sequence diversity of a factor required for actin-based motility in natural populations of Burkholderia species. Journal of Clinical Microbiology, 2008. 46(7): p. 2418-2422.
14	Tay, S.T., P.C. Cheah, and S.D. Puthucheary, Sequence polymorphism and PCR-restriction fragment length polymorphism analysis of the flagellin gene of Burkholderia pseudomallei. Journal of Clinical Microbiology, 2010. 48(4): p. 1465-1467.
15	Tuanyok, A., et al., Genomic islands from five strains of Burkholderia pseudomallei. BMC Genomics, 2008. 9(1): p. 566.
16	Tuanyok, A., et al., The Genetic and Molecular Basis of O-Antigenic Diversity in Burkholderia pseudomallei Lipopolysaccharide. PLOS Neglected Tropical Diseases, 2012. 6(1): p. e1453.
17	Vander Broek, C.W. and J.M. Stevens, Type III Secretion in the Melioidosis Pathogen Burkholderia pseudomallei. Frontiers in Cellular and Infection Microbiology, 2017. 7.
